# Supplementary material
Source: PubMed Central journal article supplement (PMC5105886)
Supplement: NIHMS760230-supplement-supplement_1.pdf [file NIHMS760230-supplement-supplement_1.pdf]

Supplementary Table 1. Frequency of Discharge Location as Provided by Source to Healthcare Cost and Utilization Project and Conversion to Study Definitions

| DISP_X (discharge location, HCUP)  | Study definition, destination (uniform) |                       |          |                          |       |
|------------------------------------|-----------------------------------------|-----------------------|----------|--------------------------|-------|
|                                    | Home                                    | Home with home health | LTAC/SNF | Inpatient rehabilitation | Death |
| Home (routine)                     | 1,939                                   | 0                     | 8        | 0                        | 0     |
| Short term hospital                | 0                                       | 0                     | 8        | 0                        | 0     |
| Acute care (another hospital)      | 0                                       | 0                     | 44       | 0                        | 0     |
| Skilled nursing (same hospital)    | 0                                       | 0                     | 22       | 0                        | 0     |
| Other care (another hospital)      | 0                                       | 0                     | 30       | 0                        | 0     |
| Home health service organization   | 0                                       | 311                   | 2        | 0                        | 0     |
| Skilled nursing (another hospital) | 0                                       | 0                     | 75       | 0                        | 0     |
| Home health (IV)                   | 0                                       | 1                     | 0        | 0                        | 0     |
| Died                               | 0                                       | 0                     | 0        | 0                        | 64    |
| Home health Services               | 0                                       | 467                   | 0        | 0                        | 0     |
| Died                               | 0                                       | 0                     | 0        | 0                        | 27    |
| Hospice                            | 0                                       | 0                     | 1        | 0                        | 0     |
| Hospice                            | 0                                       | 0                     | 1        | 0                        | 0     |
| Inpatient rehabilitation           | 0                                       | 0                     | 0        | 70                       | 0     |
| Long-term hospital, swing bed      | 0                                       | 0                     | 1        | 0                        | 0     |
| Psychiatric hospital               | 0                                       | 0                     | 1        | 0                        | 0     |

HCUP, Healthcare Cost and Utilization Project; LTAC, Long-term acute care; SNF,

Skilled nursing facility; IV, intravenous line.

Supplementary Table 2. Identifying Reason for Transplant (ICD-9-CM Codes and Rules for Assignment)

|                                                             | <b>ICD-9-CM Diagnosis Code, Category</b>                       |
|-------------------------------------------------------------|----------------------------------------------------------------|
| <b>Diagnosis category</b>                                   |                                                                |
| Hepatitis C                                                 | 070.41, 070.44, 070.51, 070.54, 070.70, 070.71, V02.62         |
| Hepatitis B                                                 | 070.20, 070.21, 070.22, 070.23, 070.30, 070.31, 070.32, V02.61 |
| Autoimmune hepatitis                                        | 279.41, 279.49, 283.0, 283.10, 283.19, 571.42                  |
| Cirrhosis, unspecified                                      | 571.5, 584.9, 576.1, 572.4, 571.8                              |
| Alcohol-related cirrhosis                                   | 571.2                                                          |
| Malignancy                                                  | 155.0                                                          |
| Necrosis                                                    | 570                                                            |
| <b>Rule</b>                                                 |                                                                |
| None of the diagnoses present                               | Unknown                                                        |
| Only cirrhosis, unspecified                                 | Other cirrhosis                                                |
| Only autoimmune or necrosis                                 | Autoimmune                                                     |
| Only alcohol-related cirrhosis                              | Alcohol                                                        |
| Only malignancy                                             | Malignancy                                                     |
| Hepatitis C or Hepatitis C AND no alcohol-related cirrhosis | Viral                                                          |

ICD-9-CM, International Classification of Diseases, Version 9, Clinical Modification.

Supplementary Table 3. Determining Reason for Readmission If Primary Diagnosis on Readmission Was 996.82 (Complications of Transplanted Liver)

| <b>Etiology</b>  | <b>ICD-9-CM code</b>                                                                                                             |
|------------------|----------------------------------------------------------------------------------------------------------------------------------|
| Biliary          | 576.2, 576.8                                                                                                                     |
| Renal            | 584.9, 584.5, 996.81                                                                                                             |
| Infectious       | 576.1, 785, 572.0, 998.59, 780.60, 038.9, 486, 599.0, 008.45, 682.6, 790.7, 465.9, 038.42, 038.49, 998.02, 038.0, 999.31, 567.22 |
| Electrolyte      | 276.1, 276.7, 275.2, 276.8, 276.51, 790.6                                                                                        |
| Respiratory/CV   | 511.9, 518.81, 428.0, 786.59, 415.19                                                                                             |
| Graft Related    | 448.89, 794.8                                                                                                                    |
| Gastrointestinal | 997.4, 787.91, 789.01, 789.09, 789.59, 789.00, 560.9, 558.9, 787.01, 577.0, 564.00                                               |
| Hematologic      | 285.9, 288.00, 284.1, 284.89, 998.11, 285.29, 453.41                                                                             |
| Wound related    | 998.12, 998.13, 998.32, 998.51, 998.31                                                                                           |
| Neurologic       | 780.97, 780.39, 572.2, 780.2, 784.0                                                                                              |

ICD-9-CM, International Classification of Diseases, Version 9, Clinical Modification
